# Supplementary material for: Mn(III)-Initiated Facile Oxygenation of Heterocyclic 1,3-Dicarbonyl Compounds
Source: Molecules. 2011 Nov 16;16(11):9562–81. doi: 10.3390/molecules16119562 (PMC6264282; doi:10.3390/molecules16119562)
Supplement: Supplementary file 1 [file molecules-16-09562-s001.docx]

**Supplementary Data**

The physical data for the pyrazolidinediones **1a**–**h** are given below.

*4-Methyl-1,2-phenylpyrazolidine-3,5-dione* (**1a**). Colorless needles (from CHCl3-hexane); mp 111–113 °C; IR (KBr) ** 1751, 1716 (C=O); 1H-NMR (300 MHz, CDCl3) *δ* 7.32–7.12 (10H, m, arom H), 3.37 (1H, q, *J* = 7.7 Hz, -CH-), 1.55 (3 H, d, *J* = 7.7 Hz, Me); 13C-NMR (75 MHz, CDCl3) *δ* 170.7 (C=O), 135.6 (arom C), 128.9, 126.7, 122.4 (arom CH), 41.1 (C-4), 12.0 (Me). Anal. Calcd for C16H14N2O2: C, 72.16; H, 5.30; N, 10.52. Found: C, 72.01; H, 5.18; N, 10.39.

*4-Ethyl-1,2-diphenylpyrazolidine-3,5-dione* (**1b**). Colorless microcrystals (from CH2Cl2-hexane); mp 104 °C (lit, mp 105–106 °C); IR (KBr) ** 1751, 1710 (C=O); 1H-NMR (300 MHz, CDCl3) *δ* 7.35–7.12 (10H, m, arom H), 3.34 (1H, t, *J* = 5.4 Hz, -CH-), 2.15–2.09 (2H, m, -CH2-CH3) 1.06 (3H, t, *J* = 7.5 Hz,
-CH2-CH3); 13C-NMR (75 MHz, CDCl3) *δ* 170.1 (C=O), 135.6 (arom C), 128.8, 126.6, 122.4 (arom CH), 47.1 (C-4), 21.6 (-CH2-CH3, Et), 10.1 (-CH2-CH3, Et).

*1,2-Dipheny-4-propylpyrazolidine-3,5-dione* (**1c**).Colorless microcrystals (from CHCl3-hexane); mp 103 °C; IR (KBr) ** 1753, 1720(C=O); 1H-NMR (300 MHz, CDCl3) *δ* 7.31–7.13 (10H, m, arom H), 3.39 (1H, t, *J* = 6.0 Hz, -CH-), 2.10–2.02 (2H, m, -CH2-C2H5), 1.58–1.50 (2H, m, -CH2-CH2-CH3), 0.98–0.93 (3H, m, -CH2-CH2-CH3,); 13C-NMR (75 MHz, CDCl3) *δ* 170.4 (C=O), 135.7 (arom C), 128.9, 126.7, 122.5 (arom CH), 46.1 (C-4), 30.1 (-CH2-CH2-CH3), 19.2 (-CH2-CH2-CH3), 13.8 (-CH2-CH2-CH3). Anal. Calcd for C18H18N2O2: C, 73.45; H, 6.16; N, 9.52. Found: C, 73.46; H, 6.06; N, 9.43.

*1,2-Diphenyl-4-*i*-propylpyrazolidine-3,5-dione* (**1d**). Colorless needles (from Et2O-hexane); mp 142 °C (lit, mp 144–145 °C); IR (KBr) **1749, 1714 (C=O); *δ* 7.31–7.13 (10H, m, arom H), 3.24 (1H, d,  *J* = 3.6 Hz, -CH-), 2.65–2.58 (1H, m, CH3-CH-CH3), 1.19 (6H, d, *J* = 6.9 Hz, CH3-CH-CH3);  13C-NMR (75 MHz, CDCl3) *δ* 169.8 (C=O), 135.7 (arom C), 128.9, 126.7, 122.5 (arom CH), 51.8 (C-4), 30.6 (CH3-CH-CH3), 19.0 (CH3-CH-CH3). Anal. Calcd for C18H18N2O2: C, 73.45; H, 6.16; N, 9.52. Found: C, 73.37; H, 6.12; N, 9.49.

*4-Butyl-1,2-diphenylpyrazolidine-3,5-dione* (**1e**).Colorless needles; mp 104–106 °C (from EtOH) (lit, mp 105.5–106.5 °C); IR (KBr) ** 1751, 1716 (C=O); 1H-NMR (300 MHz, CDCl3) *δ* 7.35–7.15 (10H, m, arom H), 3.40–3.36 (1H, m, -CH-), 2.12–2.04 (2H, m, -CH2-C3H7), 1.51–1.32 (4H, m, -CH2-CH2-CH2-CH3), 0.92–0.87 (3H, m, -CH2-CH2-CH2-CH3); 13C-NMR (75 MHz, CDCl3) *δ* 170.3 (C=O), 135.7 (arom C), 128.9, 126.7, 122.5 (arom CH), 46.2 (C-4), 27.9 (-CH2-CH2-CH2-CH3), 22.4 (-CH2-CH2-CH2-CH3 and -CH2-CH2-CH2-CH3), 13.6 (-CH2-CH2-CH2-CH3).

*4-t-Butyl-1,2-diphenylpyrazolidine-3,5-dione* (**1f**).Colorless needles (from Et2O-hexane); mp 178 °C; IR (KBr) ** 1743, 1708 (C=O); 1H-NMR (300 MHz, CDCl3) *δ* 7.32–7.12 (10H, m, arom H), 2.95 (1H, s, -CH-), 1.25 (9H, s, 3 × CH3); 13C-NMR (75 MHz, CDCl3) *δ* 169.4 (C=O), 135.8 (arom C), 128.8, 126.5, 122.5 (arom CH), 55.1 (C-4), 36.7 (-C(CH3)3), 27.5 (-C(CH3)3). Anal. Calcd for C19H20N2O2: C, 74.00; H, 6.54; N, 9.08. Found: C, 74.16; H, 6.55; N, 9.07.

*4-Benzyl-1,2-diphenylpyrazolidine-3,5-dione* (**1g**).Colorless blocks (from CHCl3-hexane); mp
136–138 °C (lit, mp 135–137 °C); IR (KBr) ** 1747, 1718 (C=O); 1H-NMR (300 MHz, CDCl3) *δ*
7.26–6.86 (15H, m, arom H), 3.65 (1H, t, *J* = 4.5 Hz, -CH-), 3.44 (2H, d, *J* = 4.5 Hz, -CH2-); 13C-NMR (75 MHz, CDCl3) *δ* 169.3 (C=O), 135.3, 135.0 (arom C), 129.9, 128.7, 128.6, 127.3, 127.0, 123.2 (arom CH), 48.5 (C-4), 33.9 (-CH2-). Anal. Calcd for C22H18N2O2: C, 77.17; H, 5.30; N, 8.18. Found: C, 77.16; H, 5.20; N, 8.08.

*4-Cyclopentyl-1,2-diphenylpyrazolidine-3,5-dione* (**1h**): Colorless microcrystals (from CH2Cl2-hexane); mp 170 °C; IR (KBr) ** 1749, 1720 (C=O); 1H-NMR (300 MHz, CDCl3) *δ* 7.30–7.12 (10H, m, arom H), 3.41 (1H, d, *J* = 4.5 Hz, -CH-), 2.60–2.59 (1H, m, -(CH2)2-CH-(CH2)2-), 1.89–1.55 (8H, m,
-(CH2)4-); 13C-NMR (75 MHz, CDCl3) *δ* 170.0 (C=O), 135.7 (arom C), 128.8, 126.6, 122.4 (arom CH), 48.5 (C-4), 40.7 (-(CH2)2-CH-(CH2)2-), 28.7, 24.8 (-(CH2)4-). Anal. Calcd for C20H20N2O2: C, 74.98; H, 6.29; N, 8.74. Found: C, 74.94; H, 6.23; N, 8.69.

The physical data for the pyrrolidinediones **3a**–**s** are given below.

*1-Benzyl-4-hydroxy-3-methyl-3-pyrrolin-2-one* (**3a**). *R*f = 0.57 (EtOAc:hexane = 9:1 v/v); colorless needles (from EtOH/hexane); mp 146–150 °C; IR (CHCl3) ** 3400–3100 (OH), 1784, 1697 (C=O);  1H-NMR (DMSO-*d*6) ** 10.65 (1H, s, OH), 7.15–7.35 (5H, m, arom H), 4.46 (2H, s, CH2-C=), 3.63 (2H, s, PhCH2), 1.58 (3H, s, Me); 13C-NMR (DMSO-*d*6) ** 173.2 (C-2, C=O), 164.8 (C-4), 138.4, 128.6, 127.4, 127.1 (arom C), 100.2 (C-3), 49.0 (C-5, CH2), 44.6 (PhCH2), 6.4 (Me). FAB HRMS (acetone/NBA) calcd for C12H14NO2 204.1025 (M+H). Found 204.1002.

*1-Benzyl-3-ethyl-4-hydroxy-3-pyrrolin-2-one* (**3b**).*R*f = 0.61 (EtOAc:hexane = 7:3 v/v); colorless cubes (from EtOH/hexane); mp 117–118 °C; IR (CHCl3) ** 3300–3000 (weak OH), 1770, 1693 (C=O); 1H-NMR (DMSO-*d*6) ** 10.70 (1H, br s, OH), 7.16–7.36 (5H, m, arom H), 4.46 (2H, s, CH2-C=), 3.64 (2H, s, PhCH2), 2.11 (2H, q, *J* = 7.8 Hz, CH2), 0.98 (3H, t, *J* = 7.8 Hz, Me); 13C-NMR (DMSO-*d*6) ** 172.7 (C-2, C=O), 164.3 (C-4), 138.3, 128.5, 127.3, 126.9 (arom C), 106.2 (C-3), 48.8 (C-5, CH2), 44.5 (PhCH2), 14.5 (CH2), 13.0 (Me). Anal. Calcd for C13H15NO2•1/3 H2O: C, 69.93; H, 7.07; N, 6.27. Found: C, 69.67; H, 6.86; N, 6.30.

*1-Benzyl-4-hydroxy-3-propyl-3-pyrrolin-2-one* (**3c**).*R*f = 0.75 (EtOAc:hexane = 7:3 v/v); colorless needles (from CHCl3/hexane); mp 124 °C; IR (CHCl3) **1768, 1689 (C=O);  1H-NMR (DMSO-*d*6) ** 10.65 (1H, br s, OH), 7.16–7.36 (5H, m, arom H), 4.47 (2H, s, CH2-C=), 3.65 (2H, s, PhCH2), 2.07 (2H, t, *J* = 7.5 Hz, CH2), 1.41 (2H, m, CH2), 0.85 (3H, t, *J* = 7.5 Hz, Me);  13C-NMR (DMSO-*d*6) ** 172.9 (C-2, C=O), 164.9 (C-4), 138.4, 128.6, 127.4, 127.1 (arom C), 104.8 (C-3), 48.9 (C-5, CH2), 44.6 (PhCH2), 23.3, 21.3 (CH2), 13.9 (Me). FAB HRMS (acetone/NBA)calcd for C14H18NO2 232.1338 (M+H). Found 232.1340.

*1-Benzyl-3-butyl-4-hydroxy-3-pyrrolin-2-one* (**3d**).*R*f = 0.44 (EtOAc:hexane = 5:5 v/v); colorless needles (from EtOH/H2O); mp 101–103 °C; IR (CHCl3) ** 3300–3000 (OH), 1770, 1689 (C=O);  1H-NMR (DMSO-*d*6) ** 10.59 (1H, br s, OH), 7.38–7.16 (5H, m, arom H), 4.47 (2H, s, CH2-C=), 3.65 (2H, s, PhCH2), 2.11 (2H, t, *J* = 4.5 Hz, CH2), 1.40 (2H, m, CH2), 1.28 (2H, m, CH2), 0.88 (3H, t,  *J* = 4.5 Hz, Me); 13C-NMR (DMSO-*d*6) ** 172.8 (C-2, C=O), 164.7 (C-4), 138.3, 128.5, 127.1, 126.9 (arom C), 104.8 (C-3), 48.8 (C-5, CH2), 44.8 (PhCH2), 30.1, 21.9, 20.8 (CH2), 13.7 (Me). FAB HRMS (acetone/NBA) calcd for C15H20NO2 246.1494 (M+H). Found 246.1487.

*1-Benzyl-3-hexyl-4-hydroxy-3-pyrrolin-2-one* (**3e**).*R*f = 0.62 (EtOAc:hexane = 5:5 v/v); colorless needles (from EtOH/hexane); mp 94–95 °C; IR (CHCl3) ** 3600–3300 (weak OH), 1768, 1689 (C=O); 1H-NMR (DMSO-*d*6) ** 10.68 (1H, br s, OH), 7.19–7.39 (5H, m, arom H), 4.50 (2H, s, CH2-C=), 3.68 (2H, s, PhCH2), 2.13 (2H, t, *J* = 9.0 Hz, CH2), 1.29–1.46 (8H, m, 4CH2), 0.89 (3H, t, *J* = 9.0 Hz, Me); 13C-NMR (DMSO-*d*6) ** 173.0 (C-2, C=O), 164.8 (C-4), 138.4, 128.6, 127.4, 127.1 (arom C), 105.0 (C-3), 48.6 (C-5, CH2), 44.6 (PhCH2), 31.2, 28.6, 27.9, 22.2, 21.2 (CH2), 13.9 (Me). FAB HRMS (acetone/NBA) calcd for C17H24NO2 274.1807 (M+H). Found 274.1795.

*1-Butyl-4-hydroxy-3-methyl-3-pyrrolin-2-one* (**3f**).*R*f = 0.32 (CHCl3:MeOH = 98:2 v/v); colorless needles (from ethanol/hexane); mp 110–112 °C; IR (CHCl3) ** 3250–3000 (weak OH), 1772, 1685 (C=O); 1H-NMR (DMSO-*d*6) ** 10.56 (1H, br s, OH), 3.71 (2H, s, CH2-C=), 3.23 (2H, t, *J* = 6.9 Hz, CH2), 1.53(3H, s, Me), 1.43 (2H, m, CH2), 1.24 (2H, m, CH2), 0.87 (3H, t, *J* = 7.2 Hz, Me); 13C-NMR (DMSO-*d*6) ** 172.9 (C-2, C=O), 164.2 (C-4), 100.3 (C-3), 49.2 (C-5, CH2), 44.6 (PhCH2), 40.3, 30.2, 19.5 (CH2), 13.7 (Me), 6.4 (Me). FAB HRMS (acetone/NBA) calcd for C9H16NO2 170.1181 (M+H). Found 170.1178.

*1-Butyl-3-ethyl-4-hydroxy-3-pyrrolin-2-one* (**3g**).*R*f = 0.49 (EtOAc:hexane = 6:4 v/v); colorless needles (from EtOAc/hexane); mp 85–87 °C; IR (CHCl3) ** 3500–3100 (OH), 1768, 1685 (C=O);
1H-NMR (DMSO-*d*6) ** 10.47 (1H, br s, OH), 3.70 (2H, s, CH2-C=), 3.23 (2H, t, *J* = 6.9 Hz, CH2), 2.04 (2H, q, *J* = 7.2 Hz, CH2), 1.43 (2H, m, CH2), 1.21 (2H, m, CH2), 0.89 (6H, t, *J* = 7.2 Hz, 2Me);  13C-NMR (DMSO-*d*6) ** 172.4 (C-2, C=O), 163.8 (C-4), 106.4 (C-3), 48.9 (C-5, CH2), 40.3, 30.1, 19.4, 14.4 (CH2), 13.7 (Me), 6.4 (Me). FAB HRMS (acetone/NBA) calcd for C10H18NO2 184.1338 (M+H). Found 184.1338.

*1,3-Dibutyl-4-hydroxy-3-pyrrolin-2-one* (**3h**). *R*f = 0.69 (EtOAc:hexane = 6:4 v/v); colorless microcrystals (from cold water); mp 113–114 °C; IR (CHCl3) ** 3300–3100 (OH), 1770, 1693 (C=O); 1H-NMR (DMSO-*d*6) ** 10.59 (1H, br s, OH), 3.77 (2H, s, CH2-C=), 3.29 (2H, t, *J* = 6.9 Hz, CH2), 2.09 (2H, t, *J* = 7.5 Hz, CH2), 1.29–1.49 (8H, m, 4CH2), 0.93 (6H, t, *J* = 7.2 Hz, 2Me); 13C-NMR (DMSO-*d*6) ** 172.8 (C-2, C=O), 164.5 (C-4), 105.3 (C-3), 49.1 (C-5, CH2), 40.3, 30.1, 21.9, 20.7, 19.4 (CH2), 13.7 (Me), 13.5 (Me). FAB HRMS (acetone-NBA) calcd for C12H22NO2 212.1651 (M+H). Found 212.1635.

*1-(*t*-Butyl)-4-hydroxy-3-methyl-3-pyrrolin-2-one* (**3i**).*R*f = 0.72 (EtOAc:hexane = 8:2 v/v); colorless needles (from EtOAc/hexane); mp 184 °C; IR (CHCl3) ** 3300–3000 (weak OH), 1768, 1689 (C=O); 1H-NMR (DMSO-*d*6) ** 10.36 (1H, br s, OH), 3.76 (2H, s, CH2-C=), 1.48 (3H, s, Me), 1.32 (9H, s, 3Me); 13C-NMR (DMSO-d6) ** 173.3 (C-2, C=O), 163.4 (C-4), 101.6 (C-3), 52.3 (quart C), 47.5 (C-5, CH2), 27.7 (3Me), 6.2 (Me). FAB HRMS (acetone-NBA) calcd for C9H16NO2 170.1181 (M+H). Found 170.1179.

*1-(*t*-Butyl)-3-ethyl-4-hydroxy-3-pyrrolin-2-one* (**3j**).*R*f = 0.32 (EtOAc:hexane = 4:6 v/v); colorless needles (from CHCl3/hexane); mp 129–130 °C; IR (CHCl3) ** 3300-3100 (weak OH), 1768, 1683 (C=O); 1H-NMR (DMSO-*d*6) ** 10.37 (1H, br s, OH), 3.76 (2H, s, CH2-C=), 2.00 (2H, q, *J* = 7.5 Hz, CH2), 1.32 (9H, s, 3Me), 0.92 (3H, t, *J* = 7.5 Hz, Me); 13C-NMR (DMSO-*d*6) ** 172.9 (C-2, C=O), 163.1 (C-4), 107.6 (C-3), 52.3 (quart C), 47.4 (C-5, CH2), 27.7 (3Me), 14.3 (CH2), 13.1 (Me). FAB HRMS (acetone/NBA) calcd for C10H18NO2 184.1338 (M+H). Found 184.1325.

*1-(*t*-Butyl)-4-hydroxy-3-propyl-3-pyrrolin-2-one* (**3k**).*R*f = 0.64 (EtOAc:hexane = 5:5 v/v); colorless needles (from EtOH/hexane); mp 145–146 °C; IR (CHCl3) ** 3400-3100 (weak OH), 1766, 1687 (C=O); 1H-NMR (DMSO-*d*6) ** 10.31 (1H, br s, OH), 3.77 (2H, s, CH2-C=), 1.97 (2H, t, *J* = 7.8 Hz, CH2), 1.38 (2H, m, CH2), 1.36 (9H, s, 3Me), 0.82 (3H, t, *J* = 7.2 Hz, Me); 13C-NMR (DMSO-*d*6) ** 173.1 (C-2, C=O), 163.6 (C-4), 106.2 (C-3), 52.3 (quart C), 47.4 (C-5, CH2), 27.7 (3Me), 23.1, 21.2 (CH2), 13.9 (Me). FAB HRMS (acetone/NBA) calcd for C11H20NO2 198.1494 (M+H). Found 198.1487.

*1-(*t*-Butyl)-3-butyl-4-hydroxy-3-pyrrolin-2-one* (**3l**).*R*f = 0.59 (EtOAc:hexane = 5:5 v/v); colorless needles (from EtOH/hexane); mp 142–144 °C; IR (CHCl3) ** 3500–3050 (OH), 1766, 1687 (C=O);
1H-NMR (DMSO-*d*6) ** 10.33 (1H, br s, OH), 3.76 (2H, s, CH2-C=), 1.99 (2H, t, *J* = 4.2 Hz, CH2), 1.29 (9H, s, 3Me), 1.23 (4H, m, 2CH2), 0.82 (3H, t, *J* = 7.2 Hz, Me); 13C-NMR (DMSO-*d*6) ** 173.2 (C-2, C=O), 163.6 (C-4), 106.4 (C-3), 52.4 (quart C), 47.5 (C-5, CH2), 27.8 (3Me), 30.1, 22.1, 20.8 (CH2), 13.8 (Me). FAB HRMS (acetone/NBA) calcd for C12H22NO2 212.1651 (M+H). Found 212.1637.

*1-(*t*-Butyl)-3-hexyl-4-hydroxy-3-pyrrolin-2-one* (**3m**).*R*f = 0.53 (EtOAc:hexane = 3:7 v/v); colorless needles (from EtOH/hexane); mp 94 °C; IR (CHCl3) ** 3300–3100 (weak OH), 1780, 1683 (C=O);  1H-NMR (DMSO-*d*6) ** 10.32 (1H, br s, OH), 3.74 (2H, s, CH2-C=), 1.95 (2H, t, *J* = 7.8 Hz, CH2), 1.36 (9H, s, 3Me), 1.36–1.21 (8H, m, 4CH2), 0.83 (3H, t, *J* = 7.2 Hz, Me); 13C-NMR (DMSO-*d*6) **173.2 (C-2, C=O), 163.5 (C-4), 106.4 (C-3), 52.4 (quart C), 47.4 (C-5, CH2), 31.1, 28.7 (CH2), 27.9 (3Me), 27.8, 22.1, 21.0 (CH2), 13.9 (Me). FAB HRMS (acetone/NBA) calcd for C14H26NO2 240.1964 (M+H). Found 240.1948.

*4-Hydroxy-3-methyl-1-(*i*-propyl)-3-pyrrolin-2-one* (**3n**).*R*f = 0.30 (EtOAc:hexane = 7:3 v/v); colorless needles (from EtOAc/hexane); mp 140–142 °C; IR (CHCl3) ** 3300–3100 (weak OH), 1770, 1683 (C=O); 1H-NMR (DMSO-*d*6) ** 10.56 (1H, br s, OH), 4.15 (1H, sep, *J* = 6.9 Hz, -CH<), 3.66 (2H, s, CH2-C=), 1.52 (3H, s, Me), 1.06 (6H, d, *J* = 6.9 Hz, 2Me); 13C-NMR (DMSO-*d*6) ** 72.3 (C-2, C=O), 164.4 (C-4), 100.5 (C-3), 44.5 (C-5, CH2), 41.1 (CH), 20.3 (2Me), 6.2 (Me). FAB HRMS (acetone/NBA) calcd for C8H14NO2 156.1025 (M+H). Found 156.1023.

*3-Ethyl-4-hydroxy-1-(*i*-propyl)-3-pyrrolin-2-one* (**3o**):*R*f = 0.55 (EtOAc:hexane = 7:3 v/v); colorless needles (from EtOAc/hexane); mp 117–118 °C; IR (CHCl3) ** 3300–3100 (weak OH), 1770, 1683 (C=O); 1H-NMR (DMSO-*d*6) ** 10.52 (1H, br s, OH), 4.15 (1H, sep, *J* = 6.0 Hz, -CH<), 3.65 (2H, s, CH2-C=), 2.04 (2H, q, *J* = 6.0 Hz, CH2), 1.06 (6H, d, *J* = 6.0 Hz, 2Me), 0.94 (3H, t, *J* = 6.0 Hz, Me); 13C-NMR (DMSO-*d*6) ** 172.0 (C-2, C=O), 164.0 (C-4), 106.7 (C-3), 44.5 (C-5, CH2), 41.0 (CH), 20.4 (2Me), 14.4 (CH2), 13.1 (Me). FAB HRMS (acetone/NBA) calcd for C9H16NO2 170.1181 (M+H). Found 170.1171.

*4-Hydroxy-1-(*i*-propyl)-3-propyl-3-pyrrolin-2-one* (**3p**). *R*f = 0.55 (EtOAc:hexane = 7:3 v/v); colorless needles (from EtOAc/hexane); mp 117–118 °C; IR (CHCl3) ** 3300–3100 (OH), 1770, 1681 (C=O); 1H-NMR (DMSO-*d*6) ** 10.49 (1H, br s, OH), 4.16 (1H, sep, *J* = 6.9 Hz, -CH<), 3.66 (2H, s, CH2-C=), 2.00 (2H, t, *J* = 7.8 Hz, CH2), 1.36 (2H, m, CH2), 1.07 (6H, d, *J* = 6.9 Hz, 2Me), 0.83 (3H, t, *J* = 7.8 Hz, Me); 13C-NMR (DMSO-*d*6) ** 172.2 (C-2, C=O), 164.6 (C-4), 105.2 (C-3), 44.5 (C-5, CH2), 41.1 (CH), 23.0, 21.2 (CH2), 20.3 (2Me), 13.8 (Me). FAB HRMS (acetone/NBA) calcd for C10H18NO2 184.1338 (M+H). Found 184.1334.

*1-Ethyl-4-hydroxy-3-methyl-3-pyrrolin-2-one* (**3q**):*R*f = 0.32 (EtOAc:hexane = 6:4 v/v); colorless microcrystals (from EtOAc/hexane); mp 121–122 °C; IR (CHCl3) ** 3300–3100 (OH), 1772, 1685 (C=O); 1H-NMR (DMSO-*d*6) ** 10.54 (1H, br s, OH), 3.72 (2H, s, CH2-C=), 3.27 (2H, q, *J* = 7.2 Hz, CH2), 1.53 (3H, s, Me), 1.02 (3H, t, *J* = 7.2 Hz, Me); 13C-NMR (DMSO-*d*6) ** 172.6 (C-2, C=O), 164.3 (C-4), 100.4 (C-3), 48.6 (C-5, CH2), 35.4 ( CH2), 15.5, 6.2 (Me). FAB HRMS (acetone/NBA)calcd for C7H11NO2Na 164.0687 (M+Na). Found 164.0692.

*Ethyl 1-benzyl-4-hydroxy-3-pyrrolin-2-one-3-carboxylate* (**3r**).*R*f = 0.68 (CHCl3:MeOH = 98:2 v/v); colorless microcrystals (from benzene/cyclohexane); mp 148–150 °C (lit., mp 148.5–150 °C); IR (CHCl3) ** 3700–3200 (OH), 1706, 1602 (C=O); 1H-NMR (CDCl3) ** 7.36–7.23 (5H, m, arom H), 4.59 (2H, s, CH2), 4.41 (2H, q, *J* = 7.2 Hz, CH2), 3.85 (2H, s, CH2-C=), 1.63 (1H, br s, OH), 1.41 (3H, t,  *J* = 7.2 Hz, Me); 13C-NMR (CDCl3) ** 183.8, 167.1 (C=O), 157.6 (C-4), 136.6 (arom C), 128.8, 128.1, 127.8 (arom CH), 98.6 (C-3), 61.3, 49.0, 45.4 (CH2), 14.2 (Me).

*1-Benzyl-4-hydroxy-3-phenyl-3-pyrrolin-2-one* (**3s**).*R*f = 0.29 (CHCl3:MeOH = 98:2 v/v); colorless needles (from EtOH/hexane); mp 197–198 °C (lit., mp 197–198 °C); IR (KBr) ** 3500-2900 (OH), 1664 (C=O); 1H-NMR (DMSO-*d*6) ** 11.71 (1H, br s, OH), 8.02–7.14 (10H, m, arom H), 4.56 (2H, s, CH2), 3.84 (2H, s, CH2); 13C-NMR (DMSO-*d*6) ** 170.9 (C-2, C=O), 166.9 (C-4), 138.0, 132.2, 128.5 (arom C), 127.6, 127.4, 127.0, 126.6, 125.5 (arom CH), 102.7 (C-3), 48.6 (C-5, CH2), 44.4 (CH2).

The physical data for the barbituric acids **5a**–**e** are given below.

*1,3-Dimethyl-5-*i*-proprylbarbituric acid* (**5a**). Yield 90%; colorless microcrystals (from CH2Cl2/hexane); mp 105 °C; IR (CHCl3) ** 1739, 1697, 1667 (C=O); 1H-NMR (300 MHz, CDCl3) ** 3.34 (1H, d, *J* = 3.8 Hz, -CH- of C-5), 3.29 (6H, s, 2 × CH3), 2.60–2.54 (1H, m, CH3-CH-CH3), 1.06 (6H, d, *J* = 6.8 Hz,
CH3-CH-CH3); 13C-NMR (75 MHz, CDCl3) ** 168.3, 151.7 (C=O), 55.2 (C-5), 36.8 (CH3-CH-CH3,
*i*-Pr), 28.1 (CH3), 19.4 (CH3-CH-CH3, *i*-Pr). Anal. Calcd for C9H14N2O3: C, 54.53; H, 7.12; N, 14.13. Found: C, 54.60; H, 7.06; N, 14.11.

*5-Benzyl-1,3-dimethylbarbituric acid* (**5b**). Colorless blocks (from CH2Cl2/hexane); mp 112 °C; IR (KBr) ** 1743, 1697, 1678 (C=O); 1H-NMR (300 MHz, CDCl3) *δ* 7.23–7.00 (5H, m, arom H),
3.78–3.75 (1H, m, -CH-), 3.44 (2H, d, *J* = 4.6 Hz, -CH2-, Bn), 3.10 (6H, s, 2 × CH3); 13C-NMR (75 MHz, CDCl3) ** 168.3, 150.9 (C=O), 135.1 (arom C), 128.8, 128.5, 127.7 (arom CH), 50.6 (C-5), 37.8 (-CH2-, Bn), 28.1 (CH3). Anal. Calcd for C13H14N2O3•2/3H2O: C, 60.46; H, 5.98; N, 10.85. Found: C, 60.54; H, 5.48; N, 12.22.

*5-(4-Methoxyphenyl)methyl-1,3-dimethylbarbituric acid* (**5c**). Colorless blocks (from CH2Cl2/hexane); mp 85 °C; IR (KBr) ** 1743, 1698, 1660 (C=O); 1H-NMR (300 MHz, CDCl3) ** 6.94–6.71 (4H, m, arom H), 3.73 (3H, s, CH3O-), 3.71–3.67 (1H, m, -CH- of C-5), 3.38–3.36 (2H, m, -CH2-), 3.10 (3H, s, CH3), 3.04 (3H, s, CH3); 13C-NMR (75 MHz, CDCl3) ** 168.1, 158.7, 150.7 (C=O), 126.8 (arom C), 129.7, 113.6 (arom CH), 54.8 (CH3O), 50.5 (C-5), 36.7 (-CH2-), 27.8 (CH3). Anal. Calcd for C14H16N2O4: C, 60.86; H, 5.84; N, 10.14. Found: C, 60.58; H, 5.43; N, 10.15.

*5-(2-Methoxyphenyl)methyl-1,3-dimethylbarbituric acid* (**5d**). Pale yellow needles (from CH2Cl2/hexane); mp 107 °C (decompd); IR (KBr) ** 1745, 1701, 1674 (C=O); 1H-NMR (300 MHz, CDCl3) ** 7.23–6.78 (4H, m, arom H), 3.80-3.77 (1H, m, -CH- of C-5), 3.73 (3H, s, CH3O), 3.40 (2H, d, *J* = 5.4 Hz, -CH2-), 3.10 (6H, s, 2 × CH3); 13C-NMR (75 MHz, CDCl3) ** 168.3, 157.1, 151.4 (C=O), 123.3 (arom C), 131.0, 123.3, 120.3, 110.0 (arom CH), , 55.0 (CH3O), 50.0 (C-5), 33.3 (-CH2-), 28.0 (CH3). Anal. Calcd for C14H16N2O4: C, 60.86; H, 5.84; N, 10.14. Found: C, 60.86; H, 5.85; N, 10.07.

*5-(2-Naphthyl)methyl-1,3-Dimethylbarbituric acid*(**5e**). Yield 88%; colorless microcrystals (from CH2Cl2/hexane); mp 130 °C; IR (KBr) ** 1693, 1670 (C=O); 1H-NMR (300 MHz, CDCl3) ** 7.78–7.12 (7H, m, arom H), 3.84 (1H, t, *J* = 4.8 Hz, -CH- of C-5), 3.63 (2H, d, *J* = 4.8 Hz, -CH2-), 3.09 (3H, s, CH3), 3.01 (3H, s, CH3); 13C-NMR (75 MHz, CDCl3) ** 168.2 (C=O), 133.3, 132.7, 132.6 (arom C), 128.3, 127.9, 127.7, 127.5, 126.7, 126.4, 126.0 (arom CH), 50.7 (C-5), 37.5 (-CH2-), 28.2 (CH3).

The physical data for the quinolinone **7** are given below.

*3-Butyl-4-hydroxy-2-quinolinone* (**7**). Yellow microcrystals (from EtOAc/hexane); mp 196 °C (lit., mp 199–200 °C); IR (KBr) ** 3400–3000 (OH and NH), 1639 (C=O); 1H-NMR (300 MHz, CDCl3) ** 10.75 (1H, s, NH), 7.32–6.52 (4H, m, arom H), 2.01–1.97 (2H, m, -CH2-C3H7), 0.86–0.73 (4H, m, -CH2-CH2-CH2-CH3), 0.30 (3H, t, *J* = 7.2 Hz, -C3H6-CH3); 13C-NMR (75 MHz, CDCl3) ** 163.5 (C=O), 156.8 (C-4), 137.2, 115.3 (arom C), 129.4, 122.4, 120.7, 114.6 (arom CH), 111.7 (C-3), 30.3 (-CH2-C3H7), 22.7 (-CH2-CH2-CH2-CH3), 22.2 (-CH2-CH2-CH2-CH3), 13.9 (-C3H6-CH3).

The physical data for the malonamides **11a** and **11b** are given below.

*2-Benzyl-N1,N3-dipropylmalonamide* (**11a**). 1.19 g (43% yield); *R*f = 0.09 (CHCl3); colorless microcrystals (from CHCl3/hexane); mp 106–107 °C; IR (KBr) ** 3500–3200 (NH), 1630 (C=O);  1H-NMR (300 MHz, CDCl3) ** 7.28–7.16 (5H, m), 6.88 (2H, br. s), 3.24–3.08 (6H, m), 1.42 (4H sex,  *J* = 7.2 Hz), 0.82 (6H, t, *J* = 7.2 Hz); 13C-NMR (75 MHz, CDCl3) ** 170.4, 138.1, 128.8, 128.6, 126.8, 57.3, 41.3, 39.0, 22.5, 11.3.

*2-Benzyl-N1,N3-dibutylmalonamide* (**11b**). 2.62 g (86% yield); *R*f = 0.1 (CHCl3); colorless needles (from CHCl3/hexane); mp 108–109 °C; IR (KBr) ** 3400–3200 (NH), 1659 (C=O); 1H-NMR (300 MHz, CDCl3) ** 7.28–7.16 (5H, m), 6.81 (2H, br. s), 3.19–3.12 (6H, m), 1.37 (4H, quin, *J* = 7.2 Hz), 1.23 (4H, sex, *J* = 7.2 Hz), 0.87 (6H, t, *J* = 7.2 Hz); 13C-NMR (75 MHz, CDCl3)** 170.3, 138.1, 128.8, 128.5, 126.8, 57.2, 39.3, 39.0, 31.3, 19.9, 13.7. Anal. Calcd for C18H28N2O2: C, 71.02; H, 9.27; N, 9.20. Found: C, 70.84; H, 9.50; N, 9.26.

The physical data for the hydroperoxides **2a**–**h**, **4a**–**p**, **6a**–**e**, and **8** are given below.

*4-Hydroperoxy-4-methyl-1,2-diphenylpyrazolidine-3,5-dione* (**2a**). Colorless microcrystals (from CH2Cl2/hexane); mp 156–158 °C (decompd); IR (KBr) ** 3500–3200 (OOH), 1762, 1724 (C=O);  1H-NMR (300MHz, CDCl3) *δ* 11.06 (1H, s, OOH), 7.34–7.16 (10H, m, arom H), 1.60 (3H, s, CH3); 13C-NMR (75 MHz, CDCl3) *δ* 168.9 (C=O), 134.9 (arom C), 129.1, 127.6, 123.4 (arom CH), 81.6 (>C-O), 17.7 (CH3). Anal. Calcd for C16H14N2O4: C, 64.42; H, 4.73; N, 9.39. Found: C, 64.19; H, 4.70; N, 9.28.

*4-Ethyl-4-hydroperoxy-1,2-diphenylpyrazolidine-3,5-dione* (**2b**). Colorless microcrystals (from EtOAc/exane); mp 141 °C; IR (KBr) ** 3600–3100 (OOH), 1762, 1724 (C=O); 1H-NMR (300 MHz, CDCl3) *δ* 10.67 (1H, s, OOH), 7.34–7.18 (10H, m, arom H), 2.04 (2H, q, *J* = 7.5 Hz, -CH2-CH3, Et), 1.03 (3H, t, *J* = 7.5 Hz, -CH2-CH3, Et); 13C-NMR (75 MHz, CDCl3) *δ* 168.5 (C=O), 134.9 (arom C), 129.1, 127.4, 123.2 (arom CH), 85.8 (>C-O), 25.8 (-CH2-CH3, Et), 6.8 (-CH2-CH3, Et). Anal. Calcd for C17H16N2O4: C, 65.38; H, 5.16; N, 8.97. Found: C, 65.10; H, 5.13; N, 8.98.

*4-Hydrperoxy-4-propyl-1,2-diphenylpyrazolidine-3,5-dione*(**2c**). Colorless microcrystals (from Et2O/hexane); mp 137 °C; IR (KBr) ** 3550–3200 (OH), 1764, 1726 (C=O); 1H-NMR (300 MHz, CDCl3) *δ* 10.95 (1H, s, OOH), 7.34–7.17 (10H, m, arom H), 1.98–1.93 (2H, m, -CH2-C2H5), 1.47-1.41 (2H, m, -CH2-CH2-CH3), 0.94 (3H, t, *J* = 7.2 Hz, -CH2-CH2-CH3); 13C-NMR (75 MHz, CDCl3) *δ* 168.8 (C=O), 134.9 (arom C), 129.1, 127.5, 123.3 (arom CH), 85.3 (>C-O), 34.3 (-CH2-CH2-CH3), 16.0 (-CH2-CH2-CH3), 14.0 (-CH2-CH2-CH3). Anal. Calcd. for C18H18N2O4: C, 66.25; H, 5.56; N, 8.54. Found: C, 65.99; H, 5.49; N, 8.45.

*4-Hydroperoxy-4-*i*-propyl-1,2-diphenylpyrazolidine-3,5-dione*(**2d**). Colorless microcrystals (from Et2O/hexane); mp 149–151 °C; IR (KBr) ** 3500–3150 (OOH), 1761, 1720 (C=O); 1H-NMR (300 MHz, CDCl3) *δ* 10.71 (1H, s, OOH), 7.37–7.16 (10H, m, arom H), 2.44 (1H, sep, *J* = 6.9 Hz, CH3-CH-CH3), 1.12 (6H, d, *J* = 6.9 Hz, CH3-CH-CH3); 13C-NMR (75 MHz, CDCl3) *δ* 168.6 (C=O), 135.0 (arom C), 129.0, 127.4, 123.1 (arom CH), 87.6 (>C-O), 33.4 (CH3-CH-CH3), 15.9 (CH3-CH-CH3). Anal. Calcd for C18H18N2O4: C, 66.25; H, 5.56; N, 8.58. Found: C, 65.97; H, 5.50; N, 8.49.

*4-Butyl-4-hydroperoxy-1,2-diphenylpyrazolidine-3,5-dione* (**2e**). Colorless microcrystals (from EtOAc/hexane); mp 124–126 °C (decompd), (lit, [7] mp 110–111 °C); IR (KBr) ** 3500–3150 (OOH), 1763, 1724 (C=O); 1H-NMR (300 MHz, CDCl3) *δ* 10.72 (1H, s, OOH), 7.34–7.18 (10H, m, arom H), 2.01–1.95 (2H, m, -CH2-C3H7), 1.40–1.31 (4H, m, -CH2-CH2-CH2-CH3), 0.85 (3H, t, *J* = 6.9 Hz,
-CH2-CH2-CH2-CH3); 13C-NMR (75 MHz, CDCl3) *δ* 168.7 (C=O), 134.9 (arom C), 129.0, 127.4, 123.2 (arom CH), 85.2 (>C-O), 32.0 (-CH2-CH2-CH2-CH3), 24.3 (-CH2-CH2-CH2-CH3), 22.5 (-CH2-CH2-CH2-CH3), 13.5 (-CH2-CH2-CH2-CH3). Anal. Calcd for C19H20N2O4: C, 67.05; H, 5.92; N, 8.23. Found: C, 66.83; H, 5.67; N, 8.05.

*4-*t*-Butyl-4-hydroperoxy-1,2-diphenylpyrazolidine-3,5-dione* (**2f**). Colorless needles (from EtOAc/hexane); mp 173–178 °C (decompd); IR (KBr) ** 3500–3150 (OOH), 1747, 1717 (C=O);
1H-NMR (300 MHz, CDCl3) *δ* 10.51 (1H, s, OOH), 7.34–7.15 (10H, m, arom H), 1.19 (9H, s, 3 × CH3); 13C-NMR (75 MHz, CDCl3) *δ* 168.6 (C=O), 135.2 (arom C), 129.0, 127.2, 123.0 (arom CH), 89.1 (>C-O), 38.7 ((CH3)3C-), 24.3 ((CH3)3C-). Anal. Calcd for C19H20N2O4: C, 67.05; H, 5.92; N, 8.23. Found: C, 67.07; H, 5.86; N, 8.15.

*4-Benzyl-4-hydroperoxy-1,2-diphenylpyrazolidine-3,5-dione* (**2g**). Colorless blocks (from CH2Cl2/benzene); mp 103–107 °C (decompd); IR (KBr) ** 3400–3150 (OOH), 1753, 1705 (C=O);  1H-NMR (300MHz, CDCl3) *δ* 11.21 (1H, s, OOH), 7.24–6.80 (15H, m, arom H), 3.31 (2H, s, CH2); 13C-NMR (75 MHz, CDCl3) *δ* 167.7 (C=O), 134.0, 130.3 (arom C), 130.6, 128.8, 127.9, 127.6, 123.9 (arom CH), 86.7 (C-O), 38.0 (CH2). Anal. Calcd for C22H18N2O4•2/3H2O: C, 68.38; H, 4.69; N, 7.24. Found: C, 68.13; H, 4.55; N, 7.11. FAB HRMS (acetone/NBA) calcd for C22H19N2O4 375.1345 (M+H). Found 375.1344.

*X-ray crystallographic data of* **2g** (R = Bn)*.* Empirical formula C22H18N2O4; formulaweight 374.3894; colorless plates; crystal dimensions 0.25× 0.50 × 0.10 mm; triclinic; space group *P*-1; *a* = 10.3233(5), *b* = 10.4273(4), *c* = 12.9985(6) Å, ** = 95.792(1)°, ** = 104.504(3)o, ** = 105.643(2)°, *V* = 1283.0(1) Å3, Z = 2; *D*calcd = 1.272 g/cm3; *F*000 = 518.00; ** (MoK**) = 0.85 cm−1; 2*θ*max = 55.0°; no. of reflections measured 11910; no. of observations (I > 3.00*σ* (I), 2** < 54.96°) 4605; no. of variables 442; reflection/parameter ratio 10.42; *R* = 0.038; *Rw* = 0.058; GOF 1.14. The crystallographic data (excluding structure factors) for the structure in this paper have been deposited with the Cambridge Crystallographic Data Centre as supplementary publication number CCDC216767. Copies of the data can be obtained, free of charge, on application to CCDC, 12 Union Road, Cambridge, CB2 1EZ, UK [fax: +44(0)-1223-336033 or e-mail: deposit@ccdc.cam.ac.uk].

*4-Cyclopentyl-4-hydroperoxy-1,2-diphenylpyrazolidine-3,5-dione* (**2h**). Colorless microcrystals (Et2O/hexane); mp 189 °C; IR (KBr) ** 3600–3200 (OOH), 1759, 1720 (C=O); 1H-NMR (300 MHz, CDCl3) *δ* 10.00 (1H, s, OOH), 7.35–7.16 (10H, m, arom H), 2.58–2.46 (1H, quin, *J* = 8.1 Hz, CH), 1.80–1.51 (8H, m, -(CH2)4); 13C-NMR (75 MHz, CDCl3) *δ* 168.7 (C=O), 142.9, 135.1(arom C), 129.1, 127.3, 123.1 (arom CH), 86.8 (>C-O), 43.5 (-(CH2)2-CH-(CH2)2-), 26.0, 24.8 (-(CH2)4-). Anal. Calcd for C34H32N2O4: C, 68.17; H, 5.72; N, 7.95. Found: C, 68.28; H, 5.72; N, 7.91.

*1-Benzyl-3-hydroperoxy-3-methylpyrrolidine-2,4-dione* (**4a**).Yield (221.1 mg, 94%); *R*f = 0.67 (EtOAc:hexane = 8:2 v/v); colorless blocks (from Et2O/hexane); mp 78–79 °C; IR (CHCl3) **
3400–3000 (OOH), 1786, 1666 (C=O);1H-NMR (CDCl3) ** 11.28 (1H, s, OOH), 7.36–7.27 (5H, m, arom H), 4.79 ( 1H, d, *J* = 14.7 Hz, CH2), 4.64 (1H, d, *J* = 14.7 Hz, CH2), 3.75 (2H, s, CH2), 1.39(3H, s, Me); 13C-NMR (CDCl3) ** 204.1 (C-4, C=O), 171.3 (C-2, C=O), 134.0, 129.1, 128.4, 128.3 (arom C), 82.5 (C-3), 53.4 (C-5, CH2), 46.8 (PhCH2), 16.7 (Me). FAB HRMS (acetone/NBA) calcd for C12H14NO4 236.0923 (M+H). Found 236.0935.

*1-Benzyl-3-ethyl-3-hydroperoxypyrrolidine-2,4-dione* (**4b**).Yield (236.8 mg, 95%); *R*f = 0.53 (EtOAc: hexane = 6:4 v/v); colorless solid; mp 72–76 °C; IR (CHCl3) ** 3500–3100 (OOH), 1782, 1693 (C=O); 1H-NMR (CDCl3) ** 11.45 (1H, s, OOH), 7.38–7.26 (5H, m, arom H), 4.73 (2H, s, CH2), 3.74 (1H, d,  *J* = 17.7 Hz, CH2), 3.64 (1H, d, *J* = 17.7 Hz, CH2), 1.85 (2H, q, *J* = 7.4 Hz, CH2), 0.89 (3H, t, *J* = 7.4 Hz, Me); 13C-NMR (CDCl3) ** 204.7 (C-4, C=O), 171.0 (C-2, C=O), 134.2, 129.1, 128.4, (arom C), 86.1 (C-3), 54.1 (C-5, CH2), 46.8 (PhCH2), 25.1 (CH2), 16.70 (Me). FAB HRMS (acetone/NBA) calcd for C13H15NO4Na 272.0899 (M+Na). Found 272.0906.

*1-Benzyl-3-hydroperoxy-3-propylpyrrolidine-2,4-dione* (**4c**).Yield (258.0 mg, 98%); *R*f = 0.54 (EtOAc:hexane = 5:5 v/v); colorless solid; mp 112 °C; IR (CHCl3) ** 3400–3100 (OOH), 1784, 1693 (C=O); 1H-NMR (CDCl3) ** 11.62 (1H, s, OOH) 7.37–7.27 (5H, m, arom H), 4.76 (1H, d, *J* = 14.7, CH2) 4.67 (1H, d, *J* = 14.7 Hz, CH2), 3.74 (1H, d, *J* = 17.7, CH2), 3.64 (1H, d, *J* = 17.4 Hz, CH2), 1.75 (2H, t, *J* = 8.4 Hz, CH2), 1.31 (2H, m, CH2), 0.88 (3H, t, *J* = 7.4 Hz, Me); 13C-NMR (CDCl3) ** 204.8 (C-4, C=O), 171.1 (C-2, C=O), 134.2, 129.1, 128.4, 128.3 (arom C), 85.7 (C-3), 54.1 (C-5, CH2), 46.8 (PhCH2), 33.5, 15.9 (CH2), 14.1 (Me). FAB HRMS (acetone/NBA) calcd for C14H17NO4Na 286.1055 (M+Na). Found 286.1032.

*1-Benzyl-3-butyl-3-hydroperoxypyrrolidine-2,4-dione* (**4d**).Yield (257.9 mg, 93%); *R*f = 0.58 (EtOAc:hexane = 5:5 v/v); colorless solid; mp 80–81 °C; IR (CHCl3) ** 3400–3100 (OOH), 1784, 1695 (C=O); 1H-NMR (CDCl3) ** 11.37 (1H, s, OOH), 7.38–7.26 (5H, m, arom H), 4.72 (2H, s, CH2), 3.74 (1H, d, *J* = 17.6 Hz, CH2), 3.64 (1H, d, *J* = 17.6 Hz, CH2), 1.79 (2H, t, *J* = 8.1 Hz, CH2), 1.18 (4H, m, 2CH2), 0.84 (3H, t, *J* = 6.9 Hz, Me); 13C-NMR (CDCl3) ** 204.8 (C-4, C=O), 171.0 (C-2, C=O), 134.2, 129.1, 128.4, 128.3 (arom C), 85.7 (C-3), 54.1 (C-5, CH2), 46.8 (PhCH2), 31.4, 24.4, 22.8 (CH2), 13.6 (Me). FAB HRMS (acetone/NBA) calcd for C15H19NO4Na 300.1212 (M+Na). Found 300.1219.

*1-Benzyl-3-hexyl-3-hydroperoxypyrrolidine-2,4-dione* (**4e**).Yield (293.2 mg, 96%); *R*f = 0.60 (EtOAc:hexane = 4: 6 v/v); colorless solid; mp 78–80 °C; IR (CHCl3) ** 3400–3100 (OOH), 1784, 1691 (C=O); 1H-NMR (CDCl3) ** 11.56 (1H, s, OOH), 7.38–7.27 (5H, m, arom H), 4.75 (1H, d,  *J* = 15.0 Hz, CH2), 4.69 (1H, d, *J* = 15.0 Hz, CH2), 3.75 (1H, d, *J* = 18.0 Hz, CH2), 3.64 (1H, d,  *J* = 18.0 Hz, CH2), 1.78 (2H, t, *J* = 7.8 Hz, CH2), 1.21 (8H, m, 4xCH2), 0.85 (3H, t, *J* = 6.5 Hz, Me); 13C-NMR (CDCl3) ** 204.8 (C-4, C=O), 171.1 (C-2, C=O), 134.2, 129.1, 128.4, 128.3 (arom C), 85.7 (C-3), 54.1 (C-5, CH2), 46.8 (PhCH2), 31.6, 31.3, 29.2, 22.4 (2C) (CH2), 14.0 (Me). FAB HRMS (acetone/NBA) calcd for C17H23NO4Na 328.1525 (M+Na). Found 328.1493.

*1-Butyl-3-hydroperoxy-3-methylpyrrolidine-2,4-dione* (**4f**).Yield (183.0 mg, 91%); *R*f = 0.52 (EtOAc:hexane = 6:4 v/v); colorless liquid; IR (CHCl3) ** 3400–3100 (OOH), 1784, 1693 (C=O);  1H-NMR (CDCl3) ** 11.75 (1H, s, OOH), 3.90 (2H, s, CH2), 3.53 (2H, t, *J* = 6.9 Hz, CH2), 1.60 (2H, m, CH2), 1.36 (2H, m, CH2), 1.35 (3H, s, CH3), 0.96 (3H, t, *J* = 7.2 Hz, Me); 13C-NMR (CDCl3) ** 204.9 (C-4, C=O), 171.3 (C-2, C=O), 82.2 (C-3), 53.9 (C-5, CH2), 42.6, 28.6, 19.9 (CH2), 16.6, 13.7 (Me). FAB HRMS (acetone/NBA) calcd for C9H15NO4Na 224.0899 (M+Na). Found 224.0897.

*1-Butyl-3-ethyl-3-hydroperoxypyrrolidine-2,4-dione* (**4g**).Yield (193.7 mg 90%); *R*f = 0.66 (EtOAc:hexane = 6:4 v/v); colorless liquid; IR (CHCl3) ** 3400–3100 (OOH), 1782, 1689 (C=O);  1H-NMR (CDCl3) ** 11.85 (1H, s, OOH), 3.90 (1H, d, *J* = 18.0 Hz, CH2), 3.83 (1H, d, *J* = 18.0 Hz, CH2), 3.63 (1H, m, CH2), 3.48 (1H, m, CH2), 1.79 (2H, q, *J* = 7.2 Hz, CH2), 1.61 (2H, m, CH2), 1.39 (2H, m, CH2), 0.96 (3H, t, *J* = 7.2 Hz, Me), 0.88 (3H, t, *J* = 7.5 Hz, Me); 13C-NMR (CDCl3) ** 205.3 (C-4, C=O), 170.7 (C-2, C=O), 85.7 (C-3), 54.5 (C-5, CH2), 42.6, 28.4, 24.6, 19.7 (CH2), 13.4, 6.7 (Me). FAB HRMS (acetone/NBA) calcd for C10H17NO4Na 238.1055 (M+Na). Found 238.1036.

*1,3-Dibutyl-3-hydroperoxypyrrolidine-2,4-dione* (**4h**).Yield (231.1 mg, 95%); *R*f = 0.53 (EtOAc:hexane = 5:5 v/v); colorless liquid; IR (CHCl3) ** 3400–3100 (OOH), 1784, 1689 (C=O);  1H-NMR (CDCl3) ** 11.85 (1H, s, OOH), 3.88 (1H, d, *J* = 18.0 Hz, CH2), 3.83 (1H, d, *J* = 18.0 Hz, CH2), 3.61 (1H, m, CH2), 3.48 (1H, m, CH2), 1.73 (2H, t, *J* = 7.8 Hz, CH2), 1.59 (2H, m, CH2), 1.37 (2H, m, CH2), 1.25 (4H, m, 2CH2), 0.96 (3H, t, *J* = 7.2 Hz, Me), 0.85 (3H, t, *J* = 6.8 Hz, Me);  13C-NMR (CDCl3) ** 205.3 (C-4, C=O), 170.8 (C-2, C=O), 85.3 (C-3), 54.4 (C-5, CH2), 42.3, 30.9, 28.3, 24.2, 22.5, 19.6 (CH2), 13.4, 13.3 (Me). FAB HRMS (acetone/NBA) calcd for C12H21NO4Na 266.1368 (M+Na), Found 266.1375.

*1-(*t*-Butyl)-3-hydroperoxy-3-methylpyrrolidine-2,4-dione* (**4i**).Yield (181.0 mg, 90%); *R*f = 0.55 (EtOAc:hexane = 7:3 v/v); colorless solid; mp 99–100 °C; IR (CHCl3) ** 3400–3100 (OOH), 1782, 1697 (C=O); 1H-NMR (CDCl3) ** 11.27 (1H, s, OOH), 3.94 (2H, s, CH2-C=O), 1.49 (9H, s, *t*-Bu), 1.32 (3H, s, Me); 13C-NMR (CDCl3) ** 205.3 (C-4, C=O), 171.5 (C-2, C=O), 83.2 (C-3), 55.8 (>C<), 52.8 (C-5, CH2), 28.1 (3CH3), 16.9 (Me). FAB HRMS (acetone/NBA) calcd for C9H16NO4 202.1079 (M+H). Found 202.1069.

*1-(*t*-Butyl)-3-ethyl-3-hydroperoxypyrrolidine-2,4-dione* (**4j**).Yield (206.6 mg, 96%); *R*f = 0.64 (EtOAc:hexane = 4:6 v/v); colorless solid; mp 130–131 °C; IR (CHCl3) ** 3500–3200 (OOH), 1780, 1695 (C=O); 1H-NMR (CDCl3) ** 12.34 (1H, s, OOH), 4.08 (1H, d, *J* = 18.3 Hz, CH2), 3.97 (1H, d,  *J* = 18.3 Hz, CH2), 1.58 (2H, q, *J* = 7.5 Hz, CH2), 1.41 (9H, s, *t*-Bu), 0.77 (3H, t, *J* = 7.5 Hz, Me);
13C-NMR (CDCl3) ** 207.7 (C-4, C=O), 169.2 (C-2, C=O), 85.3 (C-3), 54.5 (>C<), 53.3 (C-5, CH2), 27.1 (3Me), 24.6 (CH2), 16.9 (Me). FAB HRMS (acetone/NBA) calcd for C10H17NO4Na 238.1055 (M+Na). Found 238.1045.

*1-(*t*-Butyl)-3-hydroperoxy-3-propylpyrrolidine-2,4-dione* (**4k**).Yield (227.1 mg, 99%); *R*f = 0.44 (EtOAc:hexane = 4:6 v/v); colorless solid; mp 112–113 °C; IR (CHCl3) ** 3450–3050 (OOH), 1782, 1685 (C=O); 1H-NMR (CDCl3) ** 11.59 (1H, s, OOH), 3.95 (1H, d, *J* = 17.8 Hz, CH2), 3.84 (1H, d,  *J* = 17.8 Hz, CH2), 1.69 (2H, t, *J* = 8.4 Hz, CH2), 1.49 (9H, s, *t*-Bu), 1.29 (2H, m, CH2), 0.88 (3H, t,  *J* = 7.1 Hz, Me); 13C-NMR (CDCl3) ** 205.7 (C-4, C=O), 171.3 (C-2, C=O), 86.5 (C-3), 55.8 (>C<), 53.3 (C-5, CH2), 33.7 (CH2), 27.5 (3Me), 15.9 (CH2), 14.1 (Me). FAB HRMS (acetone/NBA) calcd for C11H20NO4 230.1392 (M+H). Found 230.1042.

*1-(*t*-Butyl)-3-butyl-3-hydroperoxypyrrolidine-2,4-dione* (**4l**).Yield (240.9 mg, 99%); *R*f = 0.58 (EtOAc:hexane = 4:6 v/v); colorless solid; mp 87–88 °C; IR (CHCl3) ** 3400–3100 (OOH), 1782, 1685 (C=O); 1H-NMR (CDCl3) ** 11.47 (1H, s, OOH), 3.95 (H, d, *J* = 18.0 Hz, CH2), 3.83 (1H, d, *J* = 18.0 Hz, CH2), 1.72 (2H, t, *J* = 7.2 Hz, CH2), 1.49 (9H, s, *t*-Bu), 1.25 (4H, m, 2CH2), 0.82 (3H, t, *J* = 7.1 Hz, Me); 13C-NMR (CDCl3) ** 205.8 (C-4, C=O), 171.2 (C-2, C=O), 86.4 (C-3), 55.8 (>C<), 53.6 (C-5, CH2), 31.4 (CH2), 27.5 (3Me), 24.4, 22.7 (CH2), 13.5 (Me). FAB HRMS (acetone/NBA) calcd for C12H22NO4 244.1549 (M+H). Found 244.1521.

*1-(t-Butyl)-3-hexyl-3-hydroperoxypyrrolidine-2,4-dione* (**4m**).Yield (276.9 mg, 98%); *R*f = 0.45 (EtOAc:hexane = 3:7 v/v); colorless solid; mp 94 °C; IR (CHCl3) ** 3400–3100 (OOH), 1780, 1685 (C=O); 1H-NMR (CDCl3) ** 11.20 (1H, s, OOH), 3.94 (H, d, *J* = 17.4 Hz, CH2), 3.83 (1H, d, *J* = 17.4 Hz, CH2), 1.71 (2H, m, CH2), 1.49 (9H, s, *t*-Bu), 1.27 (8H, m, 4CH2), 0.85 (3H, t, *J* = 6.9 Hz, Me);  13C-NMR (CDCl3) ** 205.7 (C-4, C=O), 171.3 (C-2, C=O), 86.6 (C-3), 55.9 (>C<), 53.6 (C-5, CH2), 31.8, 31.3, 29.2 (CH2), 27.6 (3Me), 22.4, 22.3 (CH2), 13.97 (Me). FAB HRMS (acetone/NBA) calcd for C14H26NO4 272.1862 (M+H). Found 272.1857.

*3-Hydroperoxy-3-methyl-1-(*i*-propyl)pyrrolidine-2,4-dione* (**4n**).Yield (177.8 mg, 95%); *R*f = 0.41 (EtOAc:hexane = 7:3 v/v); colorless solid; mp 82–84 °C; IR (CHCl3) ** 3400–3100 (OOH), 1784, 1685 (C=O); 1H-NMR (CDCl3) ** 11.65 (1H, s, OOH), 4.66 (1H, sep, *J* = 6.6 Hz, CH), 3.87 (1H, d, *J* = 17.7 Hz, CH2), 3.80 (1H, d, *J* = 17.7 Hz, CH2), 1.32 (3H, s, Me), 1.25 (3H, d, *J* = 6.6 Hz, Me), 1.22 (3H, d,  *J* = 6.6 Hz, Me); 13C-NMR (CDCl3) ** 204.9 (C-4, C=O), 170.5 (C-2, C=O), 82.6 (C-3), 49.0 (C-5, CH2), 43.1 (CH), 19.43, 18.88, 16.36 (Me). FAB HRMS (acetone/NBA) calcd for C8H13NO4Na 210.0742 (M+Na). Found 210.0740.

*3-Ethyl-3-hydroperoxy-1-(*i*-propyl)pyrrolidine-2,4-dione* (**4o**).Yield (195.2 mg, 97%); *R*f = 0.50 (EtOAc:hexane = 7:3 v/v); colorless solid; mp 63–65 °C; IR (CHCl3) ** 3600–3100 (OOH), 1782, 1685 (C=O); 1H-NMR (CDCl3) ** 11.66 (1H, s, OOH), 4.69 (1H, sep, *J* = 6.6 Hz, CH), 3.85 (1H, d, *J* = 17.4 Hz, CH2), 3.71 (1H, d, *J* = 17.4 Hz, CH2), 1.79 (2H, q, *J* = 7.3 Hz, CH2), 1.26 (3H, d, *J* = 6.6 Hz, Me), 1.23 (3H, d, *J* = 6.6 Hz, Me), 0.78 (3H, t, *J* = 7.3 Hz, Me); 13C-NMR (CDCl3) ** 205.3 (C-4, C=O), 170.1 (C-2, C=O), 86.4 (C-3), 49.7 (C-5, CH2), 43.1 (CH), 24.7 (CH2), 19.7, 18.9, 6.8 (Me). FAB HRMS (acetone/NBA) calcd for C9H15NO4Na 224.0899 (M+Na). Found 224.0895.

*3-Hydroperoxy-1-(*i*-propyl)-3-propylpyrrolidine-2,4-dione* (**4p**).Yield (211.0 mg, 98%); *R*f = 0.59 (EtOAc:hexane = 7:3 v/v); colorless solid; mp 78 °C; IR (CHCl3) ** 3600–3100 (OOH), 1782, 1685 (C=O); 1H-NMR (CDCl3) ** 11.71 (1H, s, OOH), 4.68 (1H, sep, *J* = 6.6 Hz, CH), 3.85 (1H, d, *J* = 17.7 Hz, CH2), 3.72 (1H, d, *J* = 17.7 Hz, CH2), 1.71 (2H, t, *J* = 8.4 Hz, CH2), 1.30 (2H, m, CH2), 1.26 (3H, d,  *J* = 6.6 Hz, Me), 1.22 (3H, d, *J* = 6.6 Hz, Me), 0.88 (3H, t, *J* = 7.2 Hz, Me); 13C-NMR (CDCl3) ** 205.3 (C-4, C=O), 170.2 (C-2, C=O), 86.0 (C-3), 49.7 (C-5, CH2), 43.0 (CH), 33.3 (CH2), 19.6, 18.9 (Me), 15.9 (CH2), 14.0 (Me). FAB HRMS (acetone/NBA) calcd for C10H17NO4Na 238.1055 (M+Na). Found 238.1044.

*5-Hydroperoxy-5-*i*-propryl-1,3-dimethylbarbituric acid*(**6a**). Colorless oil; IR (CHCl3) ** 3600–3100 (OOH), 1691 (C=O); 1H-NMR (300 MHz, CDCl3) *δ* 10.35 (1H, s, OOH), 3.37 (6H, s, 2 × CH3), 2.38 (1H, sep, *J* = 6.9 Hz, CH3-CH-CH3), 0.97 (6H, d, *J* = 6.9 Hz, CH3-CH-CH3); 13C-NMR (75 MHz, CDCl3) *δ* 168.1, 150.7 (C=O), 89.5 (>C-O), 36.9 (CH3-CH-CH3), 29.0 (CH3), 16.6 (CH3-CH-CH3). FAB HRMS (acetone/NBA) calcd for C9H14N2O5 231.0903 (M+H). Found231.0982.

*5-Benzyl-5-hydroperoxy-1,3-dimethylbarbituric acid*(**6b**). Colorless blocks (from CH2Cl2/hexane); mp 130 °C; IR (KBr) ** 3500–3200 (OOH), 1697, 1678 (C=O); 1H-NMR (300 MHz, CDCl3) *δ* 10.67 (1H, s, OOH), 7.28-7.26 (3H, m, arom H), 7.00–6.96 (2H, m, arom H), 3.25 (2H, s, CH2), 3.13 (6H, s,
2 × CH3); 13C-NMR (75 MHz, CDCl3) *δ* 168.3, 149.4 (C=O), 130.2 (arom C), 129.1, 128.7, 128.6, 128.5 (arom CH), 87.2 (>C-O), 42.7 (CH2), 28.6 (CH3). Anal. Calcd for C13H14N2O5: C, 56.11; H, 5.07; N, 10.07. Found: C, 55.87; H, 5.01; N, 10.18.

*5-Hydroperoxy-5-[(4-methoxyphenyl)methyl]-1,3-dimethylbarbituric acid*(**6c**). Colorless blocks (from CH2Cl2/hexane); mp 117 °C; IR (KBr) ** 3600–3100 (OOH), 1728, 1692 (C=O); 1H-NMR (300 MHz, CDCl3) *δ* 10.85 (1H, s, OOH), 6.88-6.75 (4H, m, arom H), 3.76 (3H, s, CH3O-), 3.19 (2H, s, CH2), 3.16 (6H, s, 2 × CH3); 13C-NMR (75 MHz, CDCl3) *δ* 168.3, 159.5, 149.5 (C=O), 121.9 (arom C), 130.2, 114.0 (arom CH), 87.2 (>C-O), 55.1 (CH3O), 41.8 (-CH2-), 28.6 (CH3). Calcd for C14H16N2O6: C, 54.54; H, 5.23; N, 9.09. Found: C, 54.51; H, 5.21; N, 9.13.

*5-Hydroperoxy-5-[(2-methoxyphenyl)methyl]-1,3-dimethylbarbituric acid*(**6d**). Colorless plates (from CH2Cl2/hexane); mp 148–150 °C (decompd); IR (KBr) ** 3500–3200 (OOH), 1674 (C=O); 1H-NMR (300 MHz, CDCl3) *δ* 9.15 (1H, br, OOH), 7.27-6.78 (4H, m, arom H), 3.77 (3H, s, CH3O), 3.27 (2H, s, -CH2-), 3.14 (6H, s, 2 × CH3); 13C-NMR (75 MHz, CDCl3) *δ* 167.9, 157.3, 150.0 (C=O), 131.7, 129.9, 120.5, 110.2 (arom CH), 119.1 (arom C), 86.9 (>C-O), 55.3 (CH3O), 37.2 (-CH2-), 28.6 (CH3). Anal. Calcd for C14H16N2O6: C, 54.54; H, 5.23; N, 9.09. Found: C, 54.55; H, 5.15; N, 9.18.

*5-Hydroperoxy-5-(2-naphthyl)methyl-1,3-dimethylbarbituric acid*(**6e**). Colorless microcrystals (from CH2Cl2/hexane); mp 135 °C; IR (KBr) ** 3500–3200 (OOH), 1705, 1678 (C=O); 1H-NMR (300 MHz, CDCl3) *δ* 10.0 (1H, br, OOH), 7.80-7.03 (7H, m, arom H), 3.41 (2H, s, CH2), 3.08 (6H, s, 2 × CH3); 13C-NMR (75 MHz, CDCl3) *δ*168.5, 149.4 (C=O), 133.2, 132.8, 127.6 (arom C), 128.7, 128.6, 127.8, 127.5, 126.9, 126.74, 126.4 (arom CH), 87.3 (>C-O), 42.9 (CH2), 28.7 (CH3). Anal. Calcd for C17H16N2O5: C, 62.19; H, 4.91; N, 8.53. Found: C, 62.45; H, 4.85; N, 8.54.

*3-Butyl-3-hydroperoxy-1*H*-quinoline-2,4-dione* (**8**). Pale yellow microcrystals (from EtOAc/hexane); mp 121 °C; IR (KBr) ** 3429 (OOH), 3350–3100 (NH), 1720, 1693, 1666 (C=O); 1H-NMR (300 MHz, DMSO-*d*6) *δ* 12.2 (1H, s, OOH), 11.0 (1, s, NH), 7.80–7.56 (2H, m, arom H), 7.14–7.03 (2H, m, arom H), 1.78–1.73 (2H, m, CH2), 1.14–1.05 (4H, m, -CH2-CH2-CH2-CH3), 0.72 (3H, t, *J* = 6.9 Hz, -CH3); 13C-NMR (75 MHz, CDCl3) *δ* 193.9, 170.1 (C=O), 141.9, 119.0 (arom C), 136.8, 126.6, 122.8, 116.6 (arom CH), 88.6 (>C-O), 35.3 (-CH2-CH2-CH2-CH3), 24.2 (-CH2-CH2-CH2-CH3), 22.1 (-CH2-CH2-CH2-CH3), 13.4 (-CH2-CH2-CH2-CH3). FAB HRMS (acetone/NBA) calcd for C13H16NO4 250.1079 (M+H). Found250.1062.

The physical data for the alcohols **9a**–**d**, **9g**, and **10b** are given below.

*4-Hydroxy-4-methyl-1,2-diphenylpyrazolidine-3,5-dione* (**9a**). Colorless microcrystals (from CH2Cl2/hexane); mp 172–173 °C; IR (KBr) ** 35100–3100 (OH), 1757, 1722 (C=O); 1H-NMR (300MHz, CDCl3) *δ* 7.33–7.17 (10H, m, arom H), 4.23 (1H, s, OH), 1.71 (3H, s, CH3); 13C-NMR (75 MHz, CDCl3) *δ* 170.8 (C=O), 135.1 (arom C), 129.0, 127.2, 122.7 (arom CH), 71.1 (>C-O), 23.4 (CH3). Anal. Calcd for C16H14N2O3: C, 68.07; H, 5.00; N, 9.92. Found: C, 68.05; H, 4.97; N, 9.96.

*4-Ethyl-4-Hydroxy-1,2-diphenylpyrazolidine-3,5-dione* (**9b**). IR (KBr) ** 3500–3150 (OH), 1759, 1720 (C=O); 1H-NMR (300 MHz, CDCl3) *δ* 7.50-7.00 (10H, m, arom H), 4.54 (1H, s, OH), 2.05 (2H, q,  *J* = 7.2 Hz, -CH2-CH3), 0.95 (3H, t, *J* = 7.2 Hz, -CH2-CH3); 13C-NMR (75 MHz, CDCl3) *δ* 170.6 (C=O), 134.7 (arom C), 128.9, 127.1, 122.8 (arom CH), 74.7 (>C-O), 30.6 (-CH2-CH3, Et), 7.0 (-CH2-CH3, Et).

*4-Hydroxy-4-propyl-1,2-diphenylpyrazolidine-3,5-dione* (**9c**). Colorless blocks (from Et2O/hexane); mp 160 °C (lit, mp 167–169 °C); IR (KBr) ** 3500–3200 (OH), 1759, 1724 (C=O); 1H-NMR (300 MHz, CDCl3) *δ* 7.33–7.16 (10H, m, arom H), 3.73 (1H, s, OH), 2.06–2.00 (2H, m, -CH2-C2H5), 1.48–1.40 (2H, m, -CH2-CH2-CH3), 0.94 (3H, t, *J* = 7.2 Hz, -CH2-CH2-CH3); 13C-NMR (75 MHz, CDCl3) *δ* 170.3 (C=O), 135.1 (arom C), 129.0, 127.2, 122.7 (arom CH), 74.0 (>C-O), 39.7 (-CH2-CH2-CH3), 16.1 (-CH2-CH2-CH3), 13.9 (-CH2-CH2-CH3). Anal. Calcd for C18H18N2O3: C, 69.66; H, 5.85; N, 9.03. Found: C, 69.71; H, 5.81; N, 8.86.

*4-Hydroxy-4-*i*-propyl-1,2-diphenylpyrazolidine-3,5-dione* (**9d**). Pale yellow plates (from Et2O/hexane); mp 175 °C (decompd); IR (KBr) ** 3550–3000 (OH), 1759, 1720 (C=O); 1H-NMR (300 MHz, CDCl3) *δ* 7.32–7.14 (10H, m, arom H), 3.85 (1H, br. S, OH), 2.34 (1H, sep, *J* = 6.9 Hz, CH3-CH-CH3), 1.15 (6H, d, *J* = 6.9 Hz, CH3-CH-CH3); 13C-NMR (75 MHz, CDCl3) *δ* 17.1 (C=O), 134.8 (arom C), 129.0, 127.0, 122.7 (arom CH), 76.3 (>C-O), 36.2 (CH3-CH-CH3), 15.6 (CH3-CH-CH3). Anal. Calcd for C18H18N2O3: C, 69.66; H, 5.85; N, 9.03. Found: C, 69.91; H, 5.50; N, 9.01.

*4-Benzyl-4-hydroxy-1,2-diphenylpyrazolidine-3,5-dione* (**9g**). Colorless needles (from EtOAc/hexane); mp 200–210 °C (decompd) (lit, mp 206–208 °C); IR (KBr) ** 3500–3100 (OH), 1764, 1705 (C=O);  1H-NMR (300 MHz, CDCl3) *δ* 7.25-6.75 (15H, m, arom H), 4.88 (1H, s, OH), 3.44 (2H, s, CH2);  13C-NMR (75 MHz, CDCl3) *δ* 169.2 (C=O), 133.8, 131.6, 130.2 (arom C), 128.7, 128.6, 127.6, 127.2, 123.4 (arom CH), 75.8 (>C-O), 43.7 (CH2). Anal. Calcd for C22H18N2O3: C, 73.73; H, 5.06; N, 7.82. Found: C, 73.47; H, 4.82; N, 7.76.

*5-Benzyl-5-hydroxy-1,3-dimethylbarbituric acid*(**10b**). Colorless blocks (from CH2Cl2/hexane); mp 112 °C; IR (KBr) ** 3500–3200 (OH), 1700, 1681 (C=O); 1H-NMR (300 MHz, CDCl3) *δ* 7.29–7.26 (3H, m, arom H), 6.98–6.95 (2H, m, arom H), 4.11 (1H, br, OH), 3.28 (2H, s, CH2), 3.10 (6H, s, 2 × CH3); 13C-NMR (75 MHz, CDCl3) *δ* 169.9, 149.7 (C=O), 131.8 (arom C), 129.1, 128.5, 128.4 (arom CH), 76.6 (>C-O), 49.5 (CH2), 28.4 (CH3). Anal. Calcd for C13H14N2O4: C, 59.54; H, 5.38; N, 10.68. Found: C, 59.30; H, 5.33; N, 10.68.

The physical data for the alcohols **12a** and **12b** are given below.

*2-Benzyl-2-hydroxy-*N1,N3*-dipropylmalonamide* (**12a**). Yield (18%); *R*f = 0.79 (Et2O); orange microcrystals; mp 74–76 °C; IR (KBr) ** 3398, 3360, 3312 (OH and NH), 1653 (C=O); 1H-NMR
(300 MHz, CDCl3) ** 7.40 (2H, br. s), 7.27-7.23 (5H, m), 4.88 (1H, br. s), 3.21–3.15 (6H, m), 1.49 (4H, sex, *J* = 7.3 Hz), 0.85 (6H, t, *J* = 7.3 Hz); 13C-NMR (75 MHz, CDCl3)** 170.9, 134.9, 130.3, 128.0, 127.0, 77.8, 46.0, 41.5, 22.5, 11.3. Anal. Calcd for C16H24N2O3: C, 65.73; H, 8.27; N, 9.58. Found: C, 65.43; H, 8.56; N, 9.37.

*2-Benzyl-*N1,N3*-dibutyl-2-hydroxymalonamide* (**12b**). Yield (25%); *R*f = 0.79 (Et2O); orange microcrystals; mp 75–77 °C; IR (KBr) ** 3377, 3314 (NH and OH), 1651 (C=O); 1H-NMR (300 MHz, CDCl3) ** 7.36 (2H, br.s), 7.26–7.22 (5H, m), 4.86 (1H, br. s), 3.23 (4H, q, *J* = 6.4 Hz), 3.14 (2H, s), 1.43 (2H, quin, *J* = 7.3 Hz), 1.27 (2H, sex, *J* = 7.3 Hz), 0.89 (3H, t, *J* = 7.3 Hz); 13C-NMR (75 MHz, CDCl3) ** 170.9, 134.9, 130.3, 128.0, 127.0, 77.8, 46.0, 39.6, 31.3, 19.9, 13.7. Anal. Calcd for C18H28N2O3: C, 67.47; H, 8.81; N, 8.74. Found: C, 67.40; H, 8.96; N, 8.73. FAB HRMS (acetone/NBA) calcd for C18H29N2O3 321.2178 (M+H). Found 321.2184.

The physical data for the alcohols **14a** and **14b** are given below.

*Methyl 3-hydroxy-2-oxotetrahydrofuran-3-carboxylate*(**14a**). Yellow oil; IR (KBr) ** 3600–3100 (OH), 1768, 1720 (C=O); 1H-NMR (300 MHz, CDCl3) *δ* 4.86 (1H, br, OH), 4.54–4.39 (2H, m, -CH2-), 3.83–3.79 (1H, m, -CH2-), 2.73–2.65 (1H, m, -CH2-), 2.36 (3H, s, Me); 13C-NMR (75 MHz, CDCl3) *δ* 205.7, 174.8 (C=O), 81.2 (>C-O), 66.0 (-CH2-), 33.8 (-CH2-), 24.5 (CH3).

*Ethyl 2-hydroxycyclopentanone-2-carboxylate*(**14b**). Pale yellow oil; IR (KBr) ** 3600–3100 (OH), 1757, 1732 (C=O); 1H-NMR (300 MHz, CDCl3) *δ* 4.28-4.21 (2H, m, -CH2-), 4.10 (1H, br, OH),
2.48–2.41 (3H, m, -CH2-), 2.13–2.07 (3H, m, -CH2-), 1.31–1.25 (3H, m, Me); 13C-NMR (75 MHz, CDCl3) *δ* 213.4, 171.5 (C=O), 79.7 (>C-O), 62.4 (-CH2-), 35.7 (-CH2-), 34.7 (-CH2-), 18.2 (-CH2-), 13.8 (CH3).
